# Supplementary material for: Bottom-up/cross-linking mass spectrometry via simplified sample processing on anion-exchange solid-phase extraction spin column
Source: Royal Society of Chemistry journal article supplement (doi:10.1039/d1cc05529a), 2021-12-12
Supplement: d1cc05529a1.xlsx [file d1cc05529a1.xlsx]

## Sheet: Table S1
Table S1. Information of identified cross-linked Hb peptides by DDA
(a) Human Hemoglobin Dimer
IGD Replicate 1
N.D.
IGD Replicate 2
Score	m/z	Charge	M+H+	Calculated Mass	Deviation in ppm	Peptide 1	Protein 1	From	To	Peptide2	Protein 2	From	To	best linkage position peptide 1	best linkage position peptide 2
62	551.973	3	1653.9	1653.91	-0.622986	[VLSPADK]	Hemoglobin subunit alpha	2	8	[VLSPADK]	Hemoglobin subunit alpha	2	8	S3	K7
PEPPI-AnExSP Replicate 1
Score	m/z	Charge	M+H+	Calculated Mass	Deviation in ppm	Peptide 1	Protein 1	From	To	Peptide2	Protein 2	From	To	best linkage position peptide 1	best linkage position peptide 2
59	866.802	3	2598.39	2598.37	8.25443	[VVAGVANALAHKYH]	Hemoglobin subunit beta	134	147	[NALAHKYH]	Hemoglobin subunit beta	140	147	Y13	K6
57	725.046	3	2173.12	2173.1	8.91223	[ANALAHKYH]	Hemoglobin subunit beta	139	147	[NALAHKYH]	Hemoglobin subunit beta	140	147	K7	Y7
67	583.059	4	2329.21	2329.19	7.60489	[GVANALAHKYH]	Hemoglobin subunit beta	137	147	[NALAHKYH]	Hemoglobin subunit beta	140	147	Y10	K6
62	907.219	4	3625.85	3625.85	0.763304	[AAWGKVGAHAGEYGAEALER]	Hemoglobin subunit alpha	13	32	[ADKTNVKAAWGKV]	Hemoglobin subunit alpha	6	18	K5	K3
51	742.99	5	3710.92	3710.89	7.27913	[KVADALTNAVAHVDDmPNALS]	Hemoglobin subunit alpha	62	82	[SALSDLHAHKLR]	Hemoglobin subunit alpha	82	93	S21	K10
80	712.777	5	3559.85	3559.86	-0.0417826	[DDMPNALSALSDLHAHKLR]	Hemoglobin subunit alpha	75	93	[ALSDLHAHKLR]	Hemoglobin subunit alpha	83	93	K17	K9
65	722.177	5	3606.86	3606.83	6.12438	[PNALSALSDLHAHKLR]	Hemoglobin subunit alpha	78	93	[AHVDDMPNALSALSDL]	Hemoglobin subunit alpha	72	87	K14	S14
80	775.887	4	3100.53	3100.52	0.795417	[PTTKTYFPHFDLSHGSAQVK]	Hemoglobin subunit alpha	38	57	[MFLSF]	Hemoglobin subunit alpha	33	37	K4	S4
101	786.213	5	3927.04	3927.08	-9.9574	[DMPNALSALSDLHAHKLR]	Hemoglobin subunit alpha	76	93	[PNALSALSDLHAHKLR]	Hemoglobin subunit alpha	78	93	K16	K14
PEPPI-AnExSP Replicate 2
Score	m/z	Charge	M+H+	Calculated Mass	Deviation in ppm	Peptide 1	Protein 1	From	To	Peptide2	Protein 2	From	To	best linkage position peptide 1	best linkage position peptide 2
63	866.801	3	2598.39	2598.37	7.09988	[VVAGVANALAHKYH]	Hemoglobin subunit beta	134	147	[NALAHKYH]	Hemoglobin subunit beta	140	147	K12	Y7
109	586.487	6	3513.89	3513.89	0.574068	[YQKVVAGVANALAHKYH]	Hemoglobin subunit beta	131	147	[VVAGVANALAHKYH]	Hemoglobin subunit beta	134	147	K15	Y13
99	712.778	5	3559.86	3559.86	1.22231	[DDMPNALSALSDLHAHKLR]	Hemoglobin subunit alpha	75	93	[ALSDLHAHKLR]	Hemoglobin subunit alpha	83	93	K17	K9
70	819.932	4	3276.71	3276.7	1.68881	[DmPNALSALSDLHAHKLR]	Hemoglobin subunit alpha	76	93	[SDLHAHKLR]	Hemoglobin subunit alpha	85	93	K16	K7
69	779.891	4	3116.54	3116.52	8.19869	[PTTKTYFPHFDLSHGSAQVK]	Hemoglobin subunit alpha	38	57	[mFLSF]	Hemoglobin subunit alpha	33	37	K4	S4
(b) Human Hemoglobin Tetramer
IGD Replicate 1
Score	m/z	Charge	M+H+	Calculated Mass	Deviation in ppm	Peptide 1	Protein 1	From	To	Peptide2	Protein 2	From	To	best linkage position peptide 1	best linkage position peptide 2
84	551.973	3	1653.9	1653.91	-0.622986	[VLSPADK]	Hemoglobin subunit alpha	2	8	[VLSPADK]	Hemoglobin subunit alpha	2	8	S3	K7
IGD Replicate 2
Score	m/z	Charge	M+H+	Calculated Mass	Deviation in ppm	Peptide 1	Protein 1	From	To	Peptide2	Protein 2	From	To	best linkage position peptide 1	best linkage position peptide 2
77	551.972	3	1653.9	1653.91	-1.71132	[VLSPADK]	Hemoglobin subunit alpha	2	8	[VLSPADK]	Hemoglobin subunit alpha	2	8	S3	K7
PEPPI-AnExSP Replicate 1
Score	m/z	Charge	M+H+	Calculated Mass	Deviation in ppm	Peptide 1	Protein 1	From	To	Peptide2	Protein 2	From	To	best linkage position peptide 1	best linkage position peptide 2
54	866.802	3	2598.39	2598.37	8.48534	[VVAGVANALAHKYH]	Hemoglobin subunit beta	134	147	[NALAHKYH]	Hemoglobin subunit beta	140	147	K12	Y7
68	600.818	4	2400.25	2400.23	8.41563	[GVANALAHKYH]	Hemoglobin subunit beta	137	147	[ANALAHKYH]	Hemoglobin subunit beta	139	147	Y10	K7
61	551.974	3	1653.91	1653.91	0.646735	[VLSPADK]	Hemoglobin subunit alpha	2	8	[VLSPADK]	Hemoglobin subunit alpha	2	8	S3	K7
59	839.413	3	2516.23	2516.2	9.76846	[PDAVmGNPKVK]	Hemoglobin subunit beta	52	62	[FFESFGDLST]	Hemoglobin subunit beta	42	51	K11	T10
91	786.214	5	3927.04	3927.08	-8.93881	[DMPNALSALSDLHAHKLR]	Hemoglobin subunit alpha	76	93	[PNALSALSDLHAHKLR]	Hemoglobin subunit alpha	78	93	K16	K14
PEPPI-AnExSP Replicate 2
Score	m/z	Charge	M+H+	Calculated Mass	Deviation in ppm	Peptide 1	Protein 1	From	To	Peptide2	Protein 2	From	To	best linkage position peptide 1	best linkage position peptide 2
68	600.818	4	2400.25	2400.23	7.91569	[GVANALAHKYH]	Hemoglobin subunit beta	137	147	[ANALAHKYH]	Hemoglobin subunit beta	139	147	Y10	K7
75	725.046	3	2173.12	2173.1	8.22199	[ANALAHKYH]	Hemoglobin subunit beta	139	147	[NALAHKYH]	Hemoglobin subunit beta	140	147	K7	Y7
131	700.839	4	2800.33	2800.34	-0.47604	[LSELHBDKLHVDPENFR]	Hemoglobin subunit beta	89	105	[GTFAT]	Hemoglobin subunit beta	84	88	K8	T5
